# Supplementary material
Source: ML conference proceedings conference paper supplement (https://proceedings.mlr.press/v31/agrawal13a.html)
Supplement: Supplementary file [file agrawal13a-supp.pdf]

## APPENDIX—SUPPLEMENTARY MATERIAL

### A Some results used in the proofs

**Fact 1** (Chernoff-Hoeffding bound). *Let  $X_1, \dots, X_n$  be independent 0–1 r.v.s with  $E[X_i] = p_i$  (not necessarily equal). Let  $X = \frac{1}{n} \sum_i X_i$ ,  $\mu = E[X] = \frac{1}{n} \sum_{i=1}^n p_i$ . Then, for any  $0 < \lambda < 1 - \mu$ ,*

$$\Pr(X \geq \mu + \lambda) \leq \exp\{-nd(\mu + \lambda, \mu)\},$$

and, for any  $0 < \lambda < \mu$ ,

$$\Pr(X \leq \mu - \lambda) \leq \exp\{-nd(\mu - \lambda, \mu)\},$$

where  $d(a, b) = a \ln \frac{a}{b} + (1 - a) \ln \frac{1-a}{1-b}$ .

**Fact 2** (Chernoff–Hoeffding bound). *Let  $X_1, \dots, X_n$  be random variables with common range  $[0, 1]$  and such that  $\mathbb{E}[X_t \mid X_1, \dots, X_{t-1}] = \mu$ . Let  $S_n = X_1 + \dots + X_n$ . Then for all  $a \geq 0$ ,*

$$\Pr(S_n \geq n\mu + a) \leq e^{-2a^2/n},$$

$$\Pr(S_n \leq n\mu - a) \leq e^{-2a^2/n}.$$

**Fact 3.**

$$F_{\alpha, \beta}^{\text{beta}}(y) = 1 - F_{\alpha + \beta - 1, y}^B(\alpha - 1),$$

for all positive integers  $\alpha, \beta$ .

Formula 7.1.13 from Abramowitz and Stegun [1964] can be used to derive the following concentration for Gaussian distributed random variables.

**Fact 4.** *Abramowitz and Stegun [1964] For a Gaussian distributed random variable  $Z$  with mean  $m$  and variance  $\sigma^2$ , for any  $z$ ,*

$$\frac{1}{4\sqrt{\pi}} \cdot e^{-z^2/2} < \Pr(|Z - m| > z\sigma) \leq \frac{1}{2} e^{-z^2/2}.$$

## B Thompson Sampling with Beta Distribution

### B.1 Proof of Lemma 3

Let  $\tau_k$  denote the time at which  $k^{\text{th}}$  trial of arm  $i$  happens. Let  $\tau_0 = 0$ . Note that  $\tau_k > T$  for  $k > k_i(T)$ .

Also,  $T \leq \tau_T$ . Then,

$$\begin{aligned} & \sum_{t=1}^T \Pr(i(t) = i, \overline{E_i^\mu(t)}) \\ & \leq \mathbb{E} \left[ \sum_{k=0}^{T-1} \sum_{t=\tau_k+1}^{\tau_{k+1}} I(i(t) = i) I(\overline{E_i^\mu(t)}) \right] \\ & = \mathbb{E} \left[ \sum_{k=0}^{T-1} I(\overline{E_i^\mu(\tau_k + 1)}) \sum_{t=\tau_k+1}^{\tau_{k+1}} I(i(t) = i) \right] \\ & = \mathbb{E} \left[ \sum_{k=0}^{T-1} I(\overline{E_i^\mu(\tau_k + 1)}) \right] \\ & \leq 1 + \mathbb{E} \left[ \sum_{k=1}^{T-1} I(\overline{E_i^\mu(\tau_k + 1)}) \right] \\ & \leq 1 + \sum_{k=1}^{T-1} \exp(-kd(x_i, \mu_i)) \\ & \leq 1 + \frac{1}{d(x_i, \mu_i)} \end{aligned}$$

The second last inequality follows from the observation that the event  $\overline{E_i^\mu(t)}$  was defined as  $\hat{\mu}_i(t) > x_i$ . At time  $\tau_k + 1$  for  $k \geq 1$ ,  $\hat{\mu}_i(\tau_k + 1) = \frac{S_i(\tau_k + 1)}{k+1} \leq \frac{S_i(\tau_k + 1)}{k}$ , where latter is simply the average of the outcomes observed from  $k$  i.i.d. plays of arm  $i$ , each of which is a Bernoulli trial with mean  $\mu_i$ . Using Chernoff-Hoeffding bounds (Fact 1), we obtain that  $\Pr(\hat{\mu}_i(\tau_k + 1) > x_i) \leq \Pr(\frac{S_i(\tau_k + 1)}{k} > x_i) \leq e^{-kd(x_i, \mu_i)}$ .  $\square$

### B.2 Proof of Lemma 4

Below, we slightly abuse the notation for readability – the notation  $\Pr(\text{Beta}(\alpha, \beta) > y_i)$  will represent the probability that a random variable distributed as  $\text{Beta}(\alpha, \beta)$  takes a value greater than  $y_i$ .

$$\begin{aligned} & \Pr \left( i(t) = i, \overline{E_i^\theta(t)} \mid E_i^\mu(t), \mathcal{F}_{t-1}, k_i(t) > L_i(T) \right) \\ & \leq \Pr(\theta_i(t) > y_i \mid \hat{\mu}_i(t) \leq x_i, \mathcal{F}_{t-1}, k_i(t) > L_i(T)) \\ & = \Pr(\theta_i(t) > y_i \\ & \quad \mid S_i(t) \leq x_i(k_i(t) + 1), \mathcal{F}_{t-1}, k_i(t) > L_i(T)) \\ & = \Pr(\text{Beta}(S_i(t) + 1, k_i(t) - S_i(t) + 1) > y_i \\ & \quad \mid S_i(t) \leq x_i(k_i(t) + 1), \mathcal{F}_{t-1}, k_i(t) > L_i(T)) \\ & \leq \Pr(\text{Beta}(x_i(k_i(t) + 1) + 1, \\ & \quad (1 - x_i)(k_i(t) + 1)) > y_i \mid \mathcal{F}_{t-1}, k_i(t) > L_i(T)) \\ & \leq e^{-L_i(T)d(x_i, y_i)} \\ & = \frac{1}{T}. \end{aligned}$$

where the last inequality used (Fact 3) along with Chernoff-Hoeffding bounds (refer to Fact 1) to obtain

that for any fixed  $k_i(t) > L_i(T)$ ,

$$\begin{aligned} & \Pr(\text{Beta}(x_i(k_i(t) + 1) + 1, (1 - x_i)(k_i(t) + 1)) \\ & \quad > y_i) \\ &= F_{k_i(t)+1, y_i}^B(x_i(k_i(t) + 1)) \\ &\leq e^{-(k_i(t)+1)d(x_i, y_i)} \\ &\leq e^{-L_i(T)d(x_i, y_i)} \end{aligned}$$

which is smaller than  $\frac{1}{T}$  because  $L_i(T) = \frac{\ln T}{d(x_i, y_i)}$ .

Then,

$$\begin{aligned} & \sum_{t=1}^T \Pr(i(t) = i, \overline{E_i^\theta(t)}, E_i^\mu(t)) \\ &= \sum_{t=1}^T \Pr(i(t) = i, k_i(t) \leq L_i(T), \overline{E_i^\theta(t)}, E_i^\mu(t)) \\ & \quad + \sum_{t=1}^T \Pr(i(t) = i, k_i(t) > L_i(T), \overline{E_i^\theta(t)}, E_i^\mu(t)) \\ &\leq \mathbb{E} \left[ \sum_{t=1}^T I(i(t) = i, k_i(t) \leq L_i(T)) \right] \\ & \quad + \mathbb{E} \left[ \sum_{t=1}^T \Pr(i(t) = i, \overline{E_i^\theta(t)} \right. \\ & \quad \quad \left. | E_i^\mu(t), \mathcal{F}_{t-1}, k_i(t) > L_i(T)) \right] \\ &\leq L_i(T) + \sum_{t=1}^T \frac{1}{T} \\ &= L_i(T) + 1. \end{aligned}$$

□

### B.3 Proof of Lemma 2

Let  $k_1(t) = j, S_1(t) = s$ . Let  $y = y_i$ . Then,  $p_{i,t} = \Pr(\theta_1(t) > y) = F_{j+1, y}^B(s)$  (using Fact 3). Let  $\tau_j + 1$  denote the time step after the  $(j)^{\text{th}}$  play of arm 1. Then,  $k_1(\tau_j + 1) = j$ , and

$$\mathbb{E} \left[ \frac{1}{p_{i, \tau_j + 1}} \right] = \sum_{s=0}^j \frac{f_{j, \mu_1}(s)}{F_{j+1, y}^B(s)}.$$

Let  $\Delta' = \mu_1 - y$ .

In the derivation below, we abbreviate  $F_{j+1, y}^B(s)$  as  $F_{j+1, y}(s)$ .

**For  $j < \frac{8}{\Delta'}$ :** Let  $R = \frac{\mu_1(1-y)}{y(1-\mu_1)}$ ,  $D = y \ln \frac{y}{\mu_1} + (1-y) \ln \frac{1-y}{1-\mu_1}$ . Note that  $\mu_1 \geq y$ , so that  $R \geq 1$ .

$$\begin{aligned} & \sum_{s=0}^j \frac{f_{j, \mu_1}(s)}{F_{j+1, y}(s)} \\ &\leq \frac{1}{1-y} \sum_{s=0}^j \frac{f_{j, \mu_1}(s)}{F_{j, y}(s)} \\ &\leq \frac{1}{1-y} \sum_{s=0}^{\lfloor yj \rfloor} \frac{f_{j, \mu_1}(s)}{f_{j, y}(s)} + \frac{1}{1-y} \sum_{s=\lfloor yj \rfloor}^j 2f_{j, \mu_1}(s) \\ &= \frac{1}{1-y} \sum_{s=0}^{\lfloor yj \rfloor} R^s \frac{(1-\mu_1)^j}{(1-y)^j} + \frac{1}{1-y} \sum_{s=\lfloor yj \rfloor}^j 2f_{j, \mu_1}(s) \\ &= \frac{1}{1-y} \left( \frac{R^{\lfloor yj \rfloor + 1} - 1}{R - 1} \right) \frac{(1-\mu_1)^j}{(1-y)^j} \\ & \quad + \frac{1}{1-y} \sum_{s=\lfloor yj \rfloor}^j 2f_{j, \mu_1}(s) \\ &\leq \frac{1}{1-y} \left( \frac{R}{R-1} \right) R^{yj} \frac{(1-\mu_1)^j}{(1-y)^j} + \frac{2}{\Delta'} \\ &= \frac{\mu_1}{\Delta'} e^{-Dj} + \frac{2}{\Delta'} \\ &\leq \frac{3}{\Delta'}. \end{aligned} \tag{4}$$

**For  $j \geq \frac{8}{\Delta'}$ :** We will divide the sum  $\text{Sum}(0, j) = \sum_{s=0}^j \frac{f_{j, \mu_1}(s)}{F_{j+1, y}(s)}$  into four partial sums and prove that

$$\begin{aligned} \text{Sum}(0, \lfloor yj \rfloor - 1) &\leq \Theta \left( e^{-Dj} \frac{1}{(j+1) \Delta'^2} \right) \\ & \quad + \Theta(e^{-2\Delta'^2 j}), \\ \text{Sum}(\lfloor yj \rfloor, \lfloor yj \rfloor) &\leq 3e^{-Dj}, \\ \text{Sum}(\lceil yj \rceil, \lfloor \mu_1 j - \frac{\Delta'}{2} j \rfloor) &\leq \Theta(e^{-\Delta'^2 j/2}), \\ \text{Sum}(\lceil \mu_1 j - \frac{\Delta'}{2} j \rceil, j) &\leq 1 + \frac{1}{e^{\Delta'^2 j/4} - 1}. \end{aligned}$$

Together, the above estimates will prove the required bound.

We use the following bounds on the cdf of Binomial distribution [Jeřábek, 2004, Prop. A.4].

For  $s \leq y(j+1) - \sqrt{(j+1)y(1-y)}$ ,

$$F_{j+1, y}(s) = \Theta \left( \frac{y(j+1-s)}{y(j+1)-s} \binom{j+1}{s} y^s (1-y)^{j+1-s} \right). \tag{5}$$

For  $s \geq y(j+1) - \sqrt{(j+1)y(1-y)}$ ,

$$F_{j+1, y}(s) = \Theta(1). \tag{6}$$

**Bounding**  $Sum(0, \lfloor yj \rfloor - 1)$ . Using the bounds just given, for any  $s$ ,

$$\begin{aligned} & \frac{f_{j,\mu_1}(s)}{F_{j+1,y}(s)} \\ & \leq \Theta \left( \frac{f_{j,\mu_1}(s)}{\frac{y(j+1-s)}{y(j+1)-s} \binom{j+1}{s} y^s (1-y)^{j+1-s}} \right) \\ & \quad + \Theta(1) f_{j,\mu_1}(s) \\ & = \Theta \left( \left( 1 - \frac{s}{y(j+1)} \right) \cdot R^s \cdot \frac{(1-\mu_1)^j}{(1-y)^{j+1}} \right) \\ & \quad + \Theta(1) f_{j,\mu_1}(s). \end{aligned}$$

This gives

$$\begin{aligned} & Sum(0, \lfloor yj \rfloor - 1) \\ & \leq \Theta \left( \frac{(1-\mu_1)^j}{(1-y)^{j+1}} \sum_{s=0}^{\lfloor yj \rfloor - 1} \left( 1 - \frac{s}{y(j+1)} \right) \cdot R^s \right) \\ & \quad + \Theta(1) \sum_{s=0}^{\lfloor yj \rfloor - 1} f_{j,\mu_1}(s). \end{aligned}$$

We now bound the first expression on the RHS.

$$\begin{aligned} & \frac{(1-\mu_1)^j}{(1-y)^{j+1}} \sum_{s=0}^{\lfloor yj \rfloor - 1} \left( 1 - \frac{s}{y(j+1)} \right) \cdot R^s \\ & = \frac{(1-\mu_1)^j}{(1-y)^{j+1}} \left( \frac{R^{\lfloor yj \rfloor} - 1}{R-1} \right. \\ & \quad \left. - \frac{1}{y(j+1)} \left( \frac{(\lfloor yj \rfloor - 1)R^{\lfloor yj \rfloor}}{R-1} - \frac{R^{\lfloor yj \rfloor} - R}{(R-1)^2} \right) \right) \\ & \leq \frac{(1-\mu_1)^j}{(1-y)^{j+1}} \left( \frac{1}{y(j+1)} \frac{R^{\lfloor yj \rfloor}}{(R-1)^2} \right. \\ & \quad \left. + \frac{(y(j+1) - \lfloor yj \rfloor + 1)}{y(j+1)} \frac{R^{\lfloor yj \rfloor}}{(R-1)} \right) \\ & \leq \frac{(1-\mu_1)^j}{(1-y)^{j+1}} \frac{3}{y(j+1)} \frac{R^{\lfloor yj \rfloor + 1}}{(R-1)^2} \\ & \leq e^{-Dj} \frac{3}{y(1-y)(j+1)} \frac{R}{(R-1)^2} \end{aligned}$$

The last inequality uses

$$\frac{(1-\mu_1)^j}{(1-y)^j} R^{\lfloor yj \rfloor} \leq \frac{(1-\mu_1)^j}{(1-y)^j} R^{yj} = e^{-Dj}.$$

Now,  $R-1 = \frac{\mu_1(1-y)}{y(1-\mu_1)} - 1 = \frac{\mu_1-y}{y(1-\mu_1)}$ . And,  $\frac{R}{R-1} =$

$\frac{\mu_1(1-y)}{\mu_1-y}$ . Therefore,

$$\begin{aligned} & \frac{1}{y(1-y)(j+1)} \frac{R}{(R-1)^2} \\ & = \frac{1}{y(1-y)(j+1)} \cdot \frac{\mu_1(1-y)}{\mu_1-y} \cdot \frac{y(1-\mu_1)}{\mu_1-y} \\ & = \frac{1}{(j+1)} \frac{\mu_1(1-\mu_1)}{(\mu_1-y)^2}. \end{aligned}$$

Substituting, we get

$$\begin{aligned} & \frac{(1-\mu_1)^j}{(1-y)^{j+1}} \sum_{s=0}^{\lfloor yj \rfloor} \left( 1 - \frac{s}{y(j+1)} \right) \cdot R^s \\ & \leq e^{-Dj} \frac{1}{(j+1)} \frac{\mu_1(1-\mu_1)}{(\mu_1-y)^2}. \end{aligned}$$

Substituting in (7)

$$\begin{aligned} & Sum(0, \lfloor yj \rfloor - 1) \\ & \leq \Theta \left( e^{-Dj} \frac{1}{(j+1)} \frac{1}{\Delta'^2} \right) + \Theta(1) \sum_{s=0}^{\lfloor yj \rfloor - 1} f_{j,\mu_1}(s) \\ & \leq \Theta \left( e^{-Dj} \frac{1}{(j+1)} \frac{1}{\Delta'^2} \right) + \Theta(e^{-2(\mu_1-y)^2 j}). \end{aligned}$$

**Bounding**  $Sum(\lfloor yj \rfloor, \lfloor yj \rfloor)$ . We use  $\frac{f_{j,\mu_1}(s)}{F_{j+1,y}(s)} \leq \frac{f_{j,\mu_1}(s)}{F_{j+1,y}(s)} = \left( 1 - \frac{s}{j+1} \right) R^s \frac{(1-\mu_1)^j}{(1-y)^{j+1}}$ , to get

$$\begin{aligned} & Sum(\lfloor yj \rfloor, \lfloor yj \rfloor) \\ & = \frac{f_{j,\mu_1}(\lfloor yj \rfloor)}{F_{j+1,y}(\lfloor yj \rfloor)} \\ & \leq \left( 1 - \frac{y \lfloor yj \rfloor - 1}{j+1} \right) R^{y \lfloor yj \rfloor} \frac{(1-\mu_1)^j}{(1-y)^{j+1}} \\ & \leq \frac{(1-y + \frac{2}{j+1})}{1-y} R^{y \lfloor yj \rfloor} \frac{(1-\mu_1)^j}{(1-y)^j} \\ & \leq 3e^{-Dj}. \end{aligned} \tag{7}$$

The last inequality uses  $j \geq \frac{1}{\Delta'} \geq \frac{1}{1-y}$ .

**Bounding**  $Sum(\lceil yj \rceil, \lfloor \mu_1 j - \frac{\Delta'}{2} j \rfloor)$ . Now, if  $j > \frac{1}{\Delta'}$ , then  $\sqrt{(j+1)y(1-y)} > \sqrt{y} > y$ , so  $y(j+1) - \sqrt{(j+1)y(1-y)} < yj \leq \lfloor yj \rfloor$ . Therefore, (using the bounds by Jeřábek [2004] given in Equation (6)) for  $s \geq \lceil yj \rceil$ ,  $F_{j+1,y}(s) = \Theta(1)$ . Using this observation, we derive the following.

$$\begin{aligned}
 & \text{Sum}(\lceil yj \rceil, \lceil \mu_1 j - \frac{\Delta'}{2} j \rceil) \\
 &= \sum_{s=\lceil yj \rceil}^{\lceil \mu_1 j - \frac{\Delta'}{2} j \rceil} \frac{f_{j, \mu_1}(s)}{F_{j+1, y}(s)} \\
 &= \Theta \left( \sum_{s=\lceil yj \rceil}^{\lceil \mu_1 j - \frac{\Delta'}{2} j \rceil} f_{j, \mu_1}(s) \right) \\
 &\leq \Theta(e^{-2(\mu_1 j - \lceil \mu_1 j - \frac{\Delta'}{2} j \rceil)^2 / j}) \\
 &= \Theta(e^{-\Delta'^2 j / 2}), \tag{8}
 \end{aligned}$$

where the inequality follows using Chernoff-Hoeffding bounds (refer to Fact 2).

**Bounding**  $\text{Sum}(\lceil \mu_1 j - \frac{\Delta'}{2} j \rceil, j)$ . For  $s \geq \lceil \mu_1 j - \frac{\Delta'}{2} j \rceil = \lceil yj + \frac{\Delta'}{2} j \rceil$ , again using Chernoff-Hoeffding bounds from Fact 2,

$$\begin{aligned}
 F_{j+1, y}(s) &\geq 1 - e^{-2(yj + \frac{\Delta'}{2} j - y(j+1))^2 / (j+1)} \\
 &\geq 1 - e^{2\Delta'} e^{-\Delta'^2 j / 2} \\
 &\geq 1 - e^{\Delta'^2 j / 4} e^{-\Delta'^2 j / 2} \\
 &= 1 - e^{-\Delta'^2 j / 4}.
 \end{aligned}$$

The last inequality uses  $j \geq \frac{8}{\Delta'}$ .

$$\begin{aligned}
 \text{Sum}(\lceil \mu_1 j - \frac{\Delta'}{2} j \rceil, j) &= \sum_{s=\lceil \mu_1 j - \frac{\Delta'}{2} j \rceil}^j \frac{f_{j, \mu_1}(s)}{F_{j+1, y}(s)} \\
 &\leq \frac{1}{1 - e^{-\Delta'^2 j / 4}} \\
 &= 1 + \frac{1}{e^{\Delta'^2 j / 4} - 1}. \tag{9}
 \end{aligned}$$

Combining, we get for  $j \geq \frac{8}{\Delta'}$ ,

$$\begin{aligned}
 & \mathbb{E} \left[ \frac{1}{p_{i, \tau_{j+1}}} \right] \\
 &\leq 1 + \Theta(e^{-\Delta'^2 j / 2} + \frac{1}{(j+1)\Delta'^2} e^{-Dj} + \frac{1}{e^{\Delta'^2 j / 4} - 1})
 \end{aligned}$$

□

## C Thompson Sampling with Gaussian Distribution

### C.1 Proof of Lemma 5

*Proof.* The proof of this lemma is similar to the proof of Lemma 4 in Appendix B.2.

Below, we slightly abuse the notation for readability – the notation  $\Pr(\mathcal{N}(m, \sigma^2) > y_i)$  will represent

the probability that a random variable distributed as  $\mathcal{N}(m, \sigma^2)$  takes a value greater than  $y_i$ .

$$\begin{aligned}
 & \Pr \left( i(t) = i, \overline{E_i^\theta(t)} \mid E_i^\mu(t), \mathcal{F}_{t-1}, k_i(t) > L_i(T) \right) \\
 &\leq \Pr(\theta_i(t) > y_i \mid \hat{\mu}_i(t) \leq x_i, \mathcal{F}_{t-1}, k_i(t) > L_i(T)) \\
 &= \Pr \left( \mathcal{N}(\hat{\mu}_i(t), \frac{1}{k_i(t) + 1}) > y_i \mid \hat{\mu}_i(t) \leq x_i, \mathcal{F}_{t-1}, k_i(t) > L_i(T) \right) \\
 &\leq \Pr \left( \mathcal{N}(x_i, \frac{1}{k_i(t) + 1}) > y_i \mid \mathcal{F}_{t-1}, k_i(t) > L_i(T) \right) \\
 &\leq \frac{1}{2} e^{-\frac{(L_i(T))(y_i - x_i)^2}{2}} \\
 &= \frac{1}{T\Delta_i^2},
 \end{aligned}$$

where the last inequality used the concentration of Gaussian distribution (refer to Fact 4) to obtain that for any fixed  $k_i(t) > L_i(T)$ ,

$$\begin{aligned}
 \Pr \left( \mathcal{N}(x_i, \frac{1}{k_i(t) + 1}) > y_i \right) &\leq \frac{1}{2} e^{-\frac{(k_i(t)+1)(y_i - x_i)^2}{2}} \\
 &\leq \frac{1}{2} e^{-\frac{(L_i(t))(y_i - x_i)^2}{2}}
 \end{aligned}$$

which is smaller than  $\frac{1}{T\Delta_i^2}$  because  $L_i(T) = \frac{2 \ln(T\Delta_i^2)}{(y_i - x_i)^2}$ . Now,

$$\begin{aligned}
 & \sum_{t=1}^T \Pr \left( i(t) = i, \overline{E_i^\theta(t)}, E_i^\mu(t) \right) \\
 &= \sum_{t=1}^T \Pr \left( i(t) = i, \overline{E_i^\theta(t)}, E_i^\mu(t), k_i(t) \leq L_i(T) \right) \\
 &\quad + \sum_{t=1}^T \Pr \left( i(t) = i, \overline{E_i^\theta(t)}, E_i^\mu(t), k_i(t) > L_i(T) \right) \\
 &\leq \mathbb{E} \left[ \sum_{t=1}^T I(i(t) = i, k_i(t) \leq L_i(T)) \right] \\
 &\quad + \sum_{t=1}^T \mathbb{E} \left[ \Pr \left( i(t) = i, \overline{E_i^\theta(t)} \mid E_i^\mu(t), k_i(t) > L_i(T), \mathcal{F}_{t-1} \right) \right] \\
 &\leq L_i(T) + \sum_{t=1}^T \frac{1}{T\Delta_i^2} \\
 &\leq L_i(T) + \frac{1}{\Delta_i^2}.
 \end{aligned}$$

□

## C.2 Proof of Lemma 6

Let  $\Theta_j$  denote a  $\mathcal{N}(\hat{\mu}_1(\tau_j + 1), \frac{1}{k_1(\tau_j + 1)})$  distributed Gaussian random variable. Let  $G_j$  be a geometric random variable denoting the number of consecutive independent trials until  $\Theta_j > y_i$ . Then, observe that  $p_{i, \tau_j + 1} = \Pr(\Theta_j > y_i)$ , and

$$\frac{1}{p_{i, \tau_j + 1}} - 1 = \mathbb{E}[G_j] = \sum_{r=1}^{\infty} \Pr(G_j \geq r)$$

We will bound the expected value of  $G_j$  by a constant for all  $j$ . Consider any integer  $r \geq 1$ . Let  $z = \sqrt{\ln r}$ , let random variable  $MAX_r$  denote the maximum of  $r$  independent samples of  $\Theta_j$ . We abbreviate  $\hat{\mu}_1(\tau_j + 1)$  as  $\hat{\mu}_1$  and  $k_1(\tau_j + 1)$  as  $k_1$  in the following. Then

$$\begin{aligned} & \Pr(G_j < r) \\ & \geq \Pr(MAX_r > y_i) \\ & \geq \Pr\left(MAX_r > \hat{\mu}_1 + \frac{z}{\sqrt{k_1}} \mid \hat{\mu}_1 + \frac{z}{\sqrt{k_1}} \geq y_i\right) \\ & \quad \cdot \Pr\left(\hat{\mu}_1 + \frac{z}{\sqrt{k_1}} \geq y_i\right) \end{aligned}$$

The following anti-concentration bound can be derived for the Gaussian r.v.  $Z$  with mean  $\mu$  and std deviation  $\sigma$ , using Formula 7.1.13 from Abramowitz and Stegun [1964]

$$\Pr(Z > \mu + z\sigma) \geq \frac{1}{\sqrt{2\pi}} \frac{z}{z^2 + 1} e^{-z^2/2}.$$

This gives

$$\begin{aligned} & \Pr\left(MAX_r > \hat{\mu}_1 + \frac{z}{\sqrt{k_1}} \mid \hat{\mu}_1 + \frac{z}{\sqrt{k_1}} \geq y_i\right) \\ & \geq 1 - \left(1 - \frac{1}{\sqrt{2\pi}} \frac{z}{(z^2 + 1)} e^{-z^2/2}\right)^r \\ & = 1 - \left(1 - \frac{1}{\sqrt{2\pi}} \frac{\sqrt{\ln r}}{(\ln r + 1)} \frac{1}{\sqrt{r}}\right)^r \\ & \geq 1 - e^{-\frac{r}{\sqrt{4\pi r \ln r}}}. \end{aligned}$$

Also, using Chernoff-Hoeffding bounds (refer to Fact 2),

$$\Pr\left(\hat{\mu}_1 + \frac{z}{\sqrt{k_1}} \geq \mu_1\right) \geq 1 - e^{-2z^2} = 1 - \frac{1}{r^2}.$$

Therefore, substituting,

$$\begin{aligned} \Pr(G_j < r) & \geq (1 - e^{-\sqrt{\frac{r}{4\pi \ln r}}}) \cdot (1 - \frac{1}{r^2}) \\ & \geq 1 - \frac{1}{r^2} - e^{-\sqrt{\frac{r}{4\pi \ln r}}}. \end{aligned}$$

$$\begin{aligned} \mathbb{E}[G_j] & = \sum_{r \geq 1} (1 - \Pr(G_j < r)) \\ & \leq \sum_{r \geq 1} \frac{1}{r^2} + e^{-\sqrt{\frac{r}{2\pi \ln r}}} \\ & \leq e^{11} + \sum_r 2 \frac{1}{r^2} \\ & \leq e^{11} + 4, \end{aligned}$$

The second last inequality in above uses the fact that for  $r \geq e^{11}$ ,  $e^{-\sqrt{\frac{r}{2\pi \ln r}}} \leq \frac{1}{r^2}$ .
